# Supplementary material for: Impact of drought hazards on flow regimes in anthropogenically impacted streams: an isotopic perspective on climate stress
Source: Copernicus journal article supplement (doi:10.5194/nhess-2024-44), 2024-05-14
Supplement: Supplementary file 1 [file nhess-2024-44-supplement.pdf]

# **SUPPLEMENTARY MATERIAL: Impact of drought hazards on flow regimes in anthropogenically impacted streams: an isotopic perspective on climate stress**

Maria Magdalena Warter<sup>1</sup>, Dörthe Tetzlaff<sup>1,2,4</sup>, Christian Marx<sup>3</sup> and Chris Soulsby<sup>1,3,4</sup>

<sup>1</sup>Department of Ecohydrology, Leibniz Institute of Freshwater Ecology and Inland Fisheries, Berlin

<sup>2</sup>Department of Geography, Humboldt Universität Berlin, Berlin, Germany

<sup>3</sup>Chair Water Resources Management and Modeling of Hydrosystems, Technische Universität Berlin, Berlin, Germany

<sup>4</sup>Northern Rivers Institute, School of Geosciences, University of Aberdeen, Aberdeen, UK

- Table S1 summarizing catchment characteristics and land use information for the rural and urban catchment.
- Figure S1 and S2 showing hydrologic and isotope responses per water year for the rural agricultural stream and urban stream respectively
- Table S2 summarizing the characteristics of storm events observed in both the rural and urban stream.
- Figure S3 showing lc-excess summarized in a boxplot for the rural and urban stream.
- Table S3 summarizing the applied transit time distribution models.
- Table S4 summarizing the results of the TPLR and gamma model for Mean Transit Time estimations.

**Table S1:** *Catchment characteristics and land use for the entire rural and urban catchment (Marx et al., 2021; Smith et al., 2020).*

|                                        | Rural (DMC) | Urban (Panke) |
|----------------------------------------|-------------|---------------|
| <b>Catchment Area (km<sup>2</sup>)</b> | 66          | 220           |
| <b><u>Land Use</u></b>                 |             |               |
| <i>Non-irrigated arable</i>            | 50.4        | 34.6          |
| <i>Urbanized</i>                       | 2.5         | 34.1*         |
| <i>Pasture</i>                         | 6.9         | <1%           |
| <i>Broadleaf Forest</i>                | 6.0         | 6.5           |
| <i>Coniferous Forest</i>               | 29.2        | 38.2          |
| <i>Mixed Forest</i>                    | 1.0         | 4.1           |
| <i>Wetlands</i>                        | 4.0         | 1.2           |
| <i>Heather and Shrub</i>               | -           | 5.2           |

\* Incl. Housing, industry, roads, squares and railroads

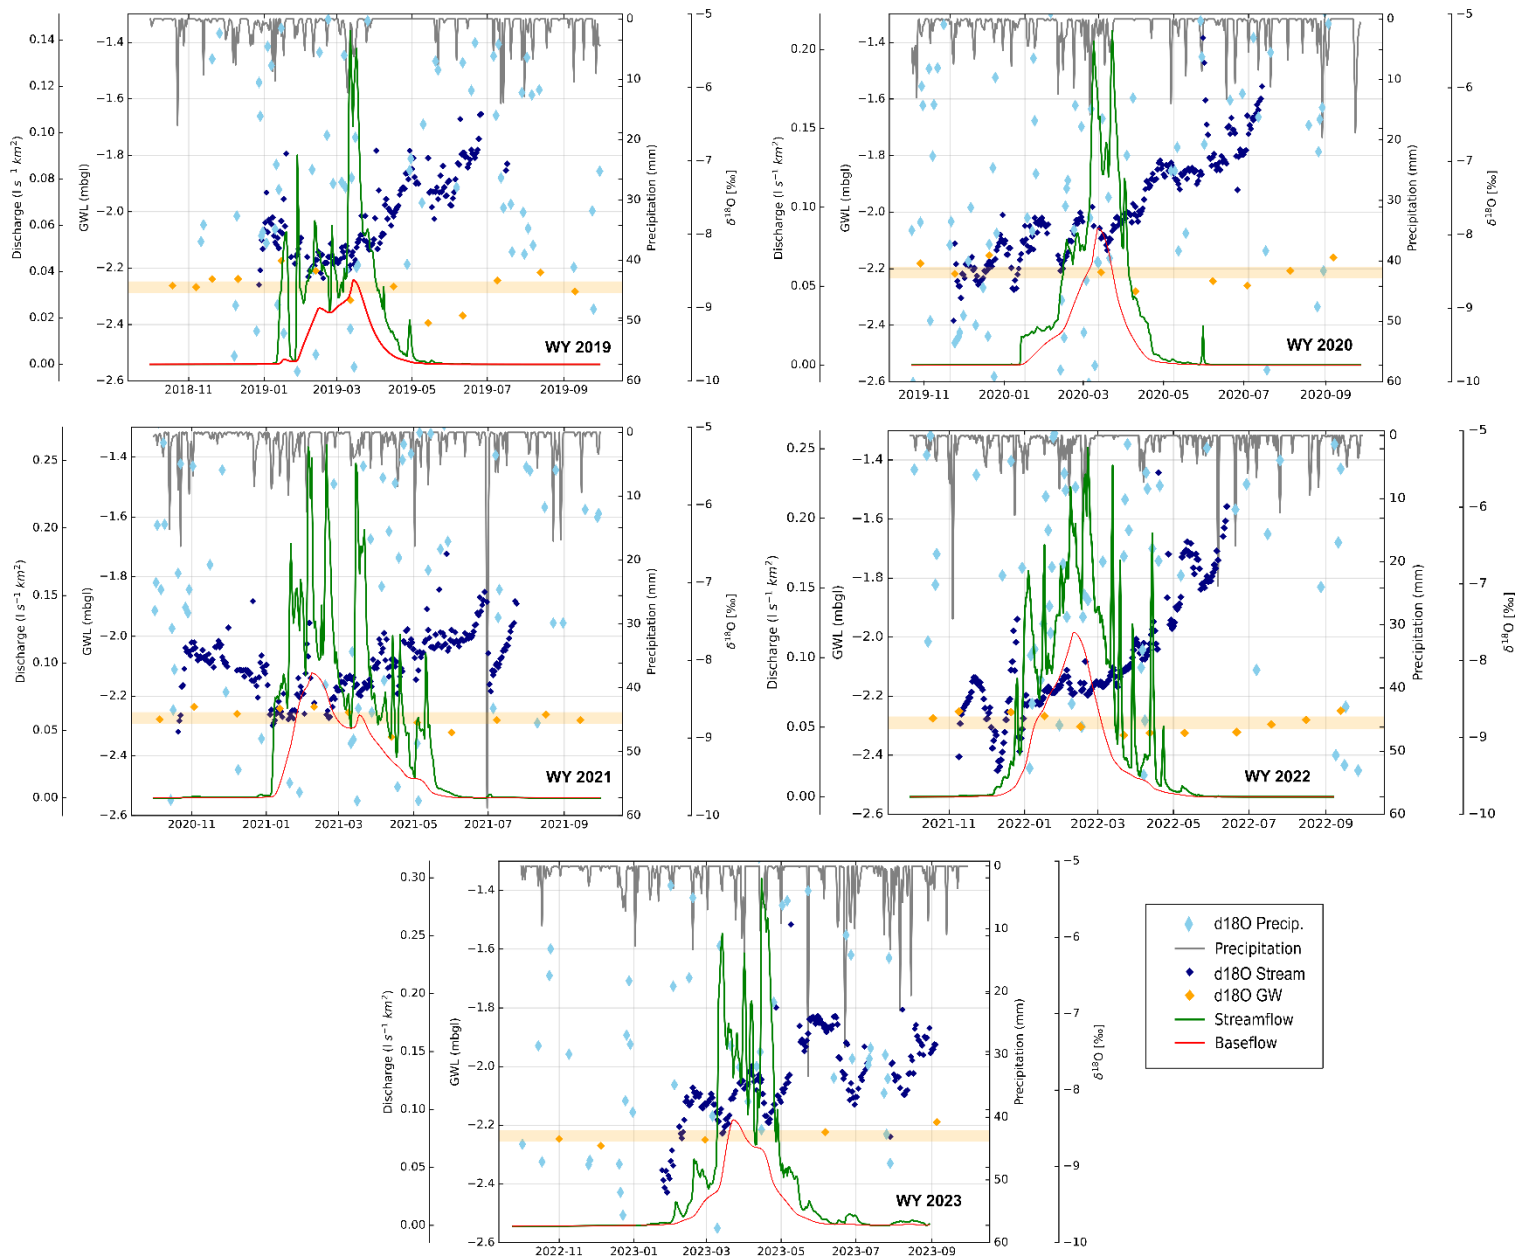

**Figure S1:** Hydrologic and isotope responses per water year for the rural stream

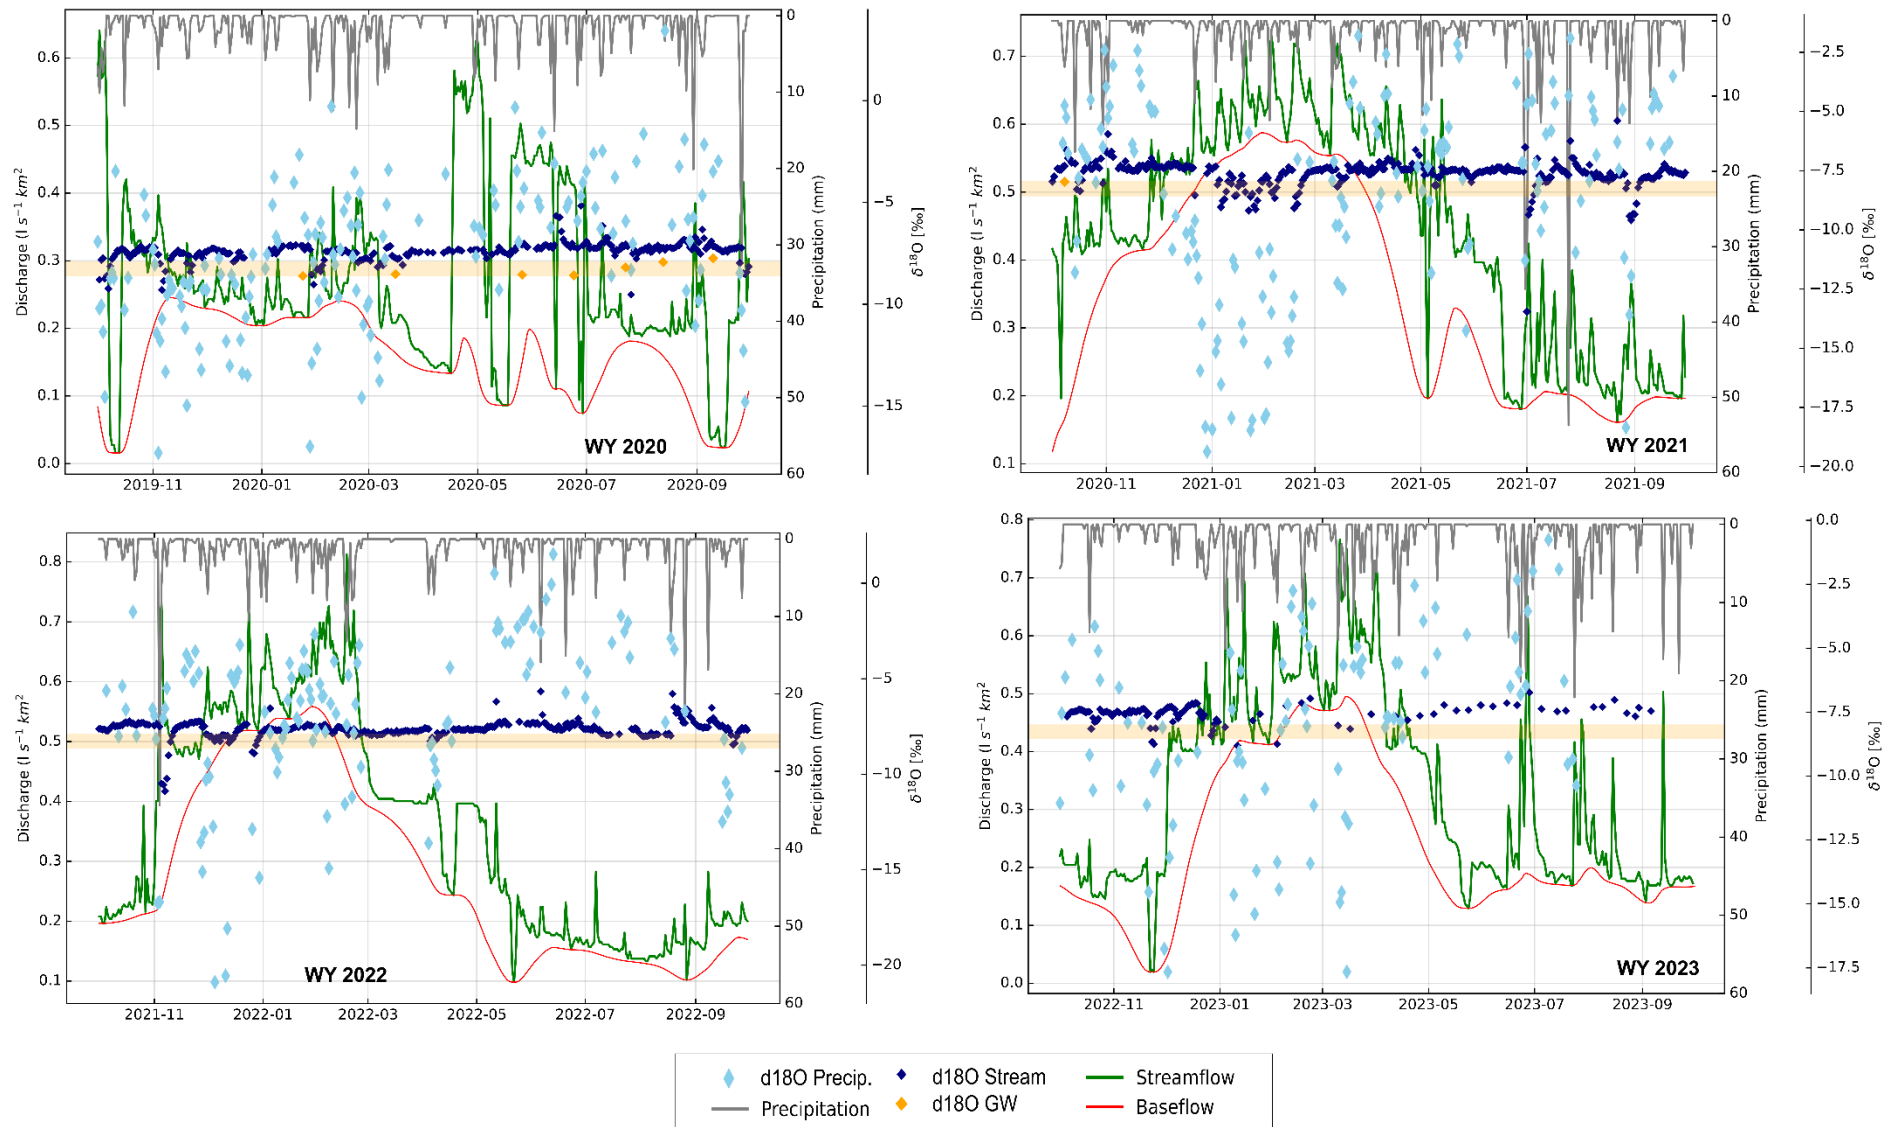

**Figure S2:** Hydrologic and isotope responses per water year for the urban stream.

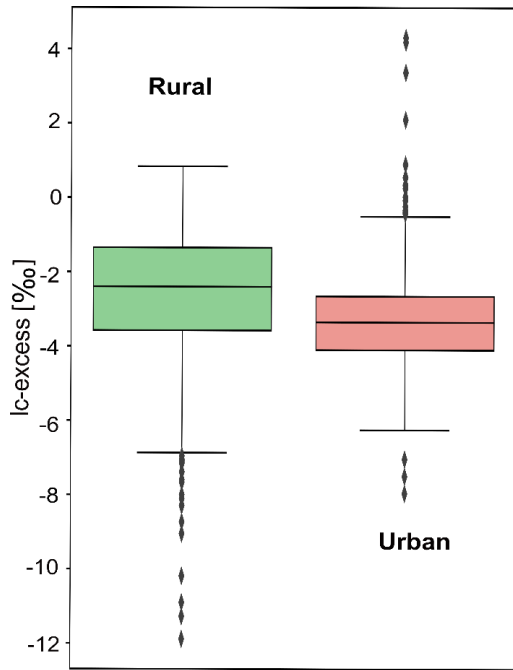

**Figure S3:** Boxplot of *lc-excess* for the rural (left) and urban (right) stream. Horizontal bars denote means, whiskers show the upper and lower percentiles. Outliers are indicated as points with more negative values indicating greater evaporative enrichment.

**Table 1:** Summarized annual discharge statistics for the rural and urban stream per water year; total annual precipitation (mm), catchment normalized mean ( $Q_{mean}$ ), maximum ( $Q_{max}$ ) and minimum discharge ( $Q_{min}$ ) (all in  $ls^{-1}km^2$ ) and 95<sup>th</sup> and 5<sup>th</sup> percentiles ( $Q_{95}$ ,  $Q_5$ ), as well as annual runoff coefficient ( $Q/P$ ), annual baseflow index ( $BFI$ ) and total annual runoff (mm).

| Water Year   | Annual P (mm/wy) | $Q_{max}$ ( $ls^{-1}km^2$ ) | $Q_{min}$ ( $ls^{-1}km^2$ ) | $Q_{mean}$ ( $ls^{-1}km^2$ ) | $Q_5$ ( $ls^{-1}km^2$ ) | $Q_{95}$ ( $ls^{-1}km^2$ ) | $Q_{R0}$ (mm/wy) | $BFI$ (-) | $Q/P$ (-) |
|--------------|------------------|-----------------------------|-----------------------------|------------------------------|-------------------------|----------------------------|------------------|-----------|-----------|
| <b>Rural</b> |                  |                             |                             |                              |                         |                            |                  |           |           |
| 2019         | 388.6            | 0.16                        | 0                           | 0.01                         | 0.06                    | <0.01                      | 44.6             | 0.54      | 0.11      |
| 2020         | 494.4            | 0.23                        | 0                           | 0.02                         | 0.13                    | <0.01                      | 52.5             | 0.72      | 0.11      |
| 2021         | 534.8            | 0.39                        | 0                           | 0.04                         | 0.18                    | <0.01                      | 133.7            | 0.58      | 0.25      |
| 2022         | 434.1            | 0.50                        | 0                           | 0.04                         | 0.18                    | <0.01                      | 113.1            | 0.64      | 0.26      |
| 2023         | 535.2            | 0.33                        | 0                           | 0.05                         | 0.22                    | <0.01                      | 115.3            | 0.56      | 0.22      |
| <b>Urban</b> |                  |                             |                             |                              |                         |                            |                  |           |           |
| 2019         | 546.4            | 1.1                         | 0.14                        | 0.45                         | 0.70                    | 0.2                        | 819.4            | 0.76      | 1.49      |
| 2020         | 527              | 1.2                         | 0.01                        | 0.27                         | 0.54                    | 0.07                       | 670.5            | 0.72      | 1.27      |
| 2021         | 600.5            | 2.3                         | 0.04                        | 0.45                         | 0.67                    | 0.19                       | 872.8            | 0.78      | 1.45      |
| 2022         | 461.4            | 2.1                         | 0.06                        | 0.35                         | 0.65                    | 0.14                       | 447.4            | 0.86      | 0.96      |
| 2023         | 624.0            | 3.4                         | 0.01                        | 0.33                         | 0.62                    | 0.165                      | 523.0            | 0.82      | 0.84      |

**Table S2:** Characteristics of storm events observed in both the rural and urban stream (highlighted in Fig. 1 of the main manuscript) during the summer (June-September) and winter (October-May) period: total discharge ( $Q$ ), total precipitation ( $P_{total}$ ), mean intensity ( $P_{int}$ ), maximum precipitation over 1 hour ( $P_{max}$ ), duration of event ( $T$ ) and runoff coefficient ( $Q/P$ ).

| Event                         | Q<br>(l $skm^2$ ) |      | P $_{total}$<br>(mm) |      | P $_{int}$<br>(mm hr $^{-1}$ ) |      | P $_{max}$<br>(mm hr $^{-1}$ ) |      | T (hrs) |     | Q/P<br>(-) |     |
|-------------------------------|-------------------|------|----------------------|------|--------------------------------|------|--------------------------------|------|---------|-----|------------|-----|
|                               | Rur               | Urb  | Rur                  | Urb  | Rur                            | Urb  | Rur                            | Urb  | Rur     | Urb | Rur        | Urb |
| <b>SUMMER</b>                 |                   |      |                      |      |                                |      |                                |      |         |     |            |     |
| <b>11.06.2019</b>             | -                 | 5.3  | 0                    | 54.9 | -                              | 13.7 | -                              | 46.2 | -       | 4   | -          | 0.1 |
| <b>26.09.2020</b>             | <0.001            |      | 27.8                 | 32.2 | 1.85                           | 3.22 | 2.2                            | 7.6  | 15      | 10  | <0.01      | 0.5 |
| <b>30.06.2021</b>             | 0.002             | 14.5 | 57.6                 | 35.5 | 5.76                           | 1.9  | 19.6                           | 6.7  | 10      | 18  | <0.01      | 0.4 |
| <b>06.06.2022</b>             | <0.001            | 3.3  | 24                   | 15.9 | 5.0                            | 2.7  | 12.8                           | 9.6  | 5       | 6   | <0.01      | 0.2 |
| <b>26.08.2022</b>             | <0.001            | 6.1  | 8.2                  | 23.5 | 2.1                            | 3.4  | 4                              | 10   |         | 7   | <0.01      | 0.3 |
| <b>22.6.2023<sup>+</sup></b>  | 0.02              | 17.1 | 31.3                 | 30.3 | 7.8                            | 1.7  | 19.01                          | 18.1 | 4       | 18  | <0.01      | 0.5 |
| <b>24.07.2023</b>             | <0.001            | 2.0  | 10.9                 | 21.2 | 5.6                            | 7.1  | 6.7                            | 17.4 | 2       | 3   | <0.01      | 0.2 |
| <b>WINTER</b>                 |                   |      |                      |      |                                |      |                                |      |         |     |            |     |
| <b>04.10.2019</b>             | <0.001            | 17.9 | 17                   | 12.6 | 8.5                            | 0.8  | 1.4                            | 2.4  | 2       | 15  | <0.01      | 0.7 |
| <b>30.10.2020</b>             | 0.003             | 59.2 | 11                   | 18.1 | 0.45                           | 9.1  | 2.2                            | 2.1  | 24      | 2   | <0.01      | 0.2 |
| <b>04.11.2021</b>             | 0.001             | 49.3 | 31.6                 | 40.6 | 1.4                            | 1.8  | 5.0                            | 4.4  | 24      | 22  | <0.01      | 0.2 |
| <b>18.10.2022</b>             | <0.001            | 13.8 | 9.5                  | 13.8 | 1.1                            | 1.7  | 3.4                            | 3.4  | 9       | 8   | <0.01      | 0.1 |
| <b>14.04.2023<sup>*</sup></b> | 6.54              | 13.8 | 28                   | 23.9 | 0.6                            | 0.5  | 1.4                            | 1.5  | 49      | 47  | 0.2        | 0.1 |
| <b>23.05.2023</b>             | 0.06              | 0.8  | 30.3                 | 0.5  | 10.1                           | 0.5  | 17.4                           | 0.5  | 3       | 1   | 0.1        | 0.1 |

\*Summarized multiple rain event spans between 14.04-17.04, with <5hr between events  
+ Event extends into 23.6

**Table S3:** Description of applied transit time distributions – gamma and two parallel linear reservoir model (TPLR).

| Model                                       | Parameters                                                                                                                         | TTD                                                                                                                             | MTT                                 |
|---------------------------------------------|------------------------------------------------------------------------------------------------------------------------------------|---------------------------------------------------------------------------------------------------------------------------------|-------------------------------------|
| <b>Gamma</b>                                | $\alpha$ = shape parameter<br>$\beta$ = scale parameter                                                                            | $\frac{\tau^{\alpha-1}}{\beta^\alpha \Gamma(\alpha)} \exp\left(-\frac{\tau}{\beta}\right)$                                      | $\alpha\beta$                       |
| <b>Two parallel linear reservoir (TPLR)</b> | $\tau_f$ = transit time of fast reservoir<br>$\tau_s$ = transit time of slow reservoir<br>$\varphi$ = ratio of fast/slow reservoir | $\frac{\varphi}{\tau_f} \exp\left(-\frac{\tau}{\tau_f}\right) + \frac{1-\varphi}{\tau_s} \exp\left(-\frac{\tau}{\tau_s}\right)$ | $\varphi\tau_f + (1-\varphi)\tau_s$ |

**Table S4:** Mean transit times estimated with TPLR and Gamma Models. TPLR TTD Parameters ( $\tau_f$  and  $\tau_s$ ) and Gamma Model fitting parameters ( $\alpha$  and  $\beta$ ), fitting efficiency (NSE), minimized root-mean-square error (RMSE), mean square error ( $R^2$ ) and estimated mean transit time (MTT). Below: TPLR Model results for a wet and a dry year in the rural and urban stream.

| <b><u>TPLR</u></b>  | $\tau_f$<br>(1-50)    | $\tau_s$<br>(1-1825) | $\phi$ | NSE  | RMSE | $R^2$ | MTT (d) |
|---------------------|-----------------------|----------------------|--------|------|------|-------|---------|
| <b><i>Rural</i></b> | 21.7                  | 1262                 | 0.6    | 0.54 | 0.63 | 0.54  | 1014    |
| <b><i>Urban</i></b> | 5.3                   | 1311                 | 0.4    | 0.57 | 0.64 | 0.59  | 1180    |
| <b><u>Gamma</u></b> | $\alpha$<br>(0.1-2.5) | $\beta$<br>(1-1825)  | -      | NSE  | RMSE | $R^2$ | MTT (d) |
| <b><i>Rural</i></b> | 0.44                  | 1704                 | -      | 0.49 | 0.67 | 0.48  | 759     |
| <b><i>Urban</i></b> | 0.42                  | 1698                 | -      | 0.46 | 0.65 | 0.46  | 707     |
